# Supplementary material for: Ultrathin free-standing polymer membranes with chemically responsive luminescence via consecutive photopolymerizations
Source: Royal Society of Chemistry journal article supplement (doi:10.1039/c5py02013a), 2015-12-23
Supplement: c5py02013a1.pdf [file c5py02013a1.pdf]

*Electronic Supplementary Information* for

**Ultrathin Free-Standing Polymer Membranes with Chemically  
Responsive Luminescence via Consecutive Photopolymerizations**

Hang Bian,<sup>a,b</sup> Jiming Yang,<sup>a</sup> Ning Zhang,<sup>a,\*</sup> Qiliao Wang,<sup>a</sup> Yongjiu Liang,<sup>a</sup>  
and Dewen Dong<sup>a,\*</sup>

<sup>a</sup> *Key Laboratory of Synthetic Rubber, Changchun Institute of Applied Chemistry, Chinese  
Academy of Sciences, Changchun 130022, P.R. China.*

<sup>b</sup> *School of Material Science and Engineering, Jilin Jianzhu University, Changchun 130118, P.  
R. China*

Correspondence to: N. Zhang, (E-mail: ning.zhang@ciac.ac.cn) or D. Dong (E-mail:  
dwdong@ciac.ac.cn)

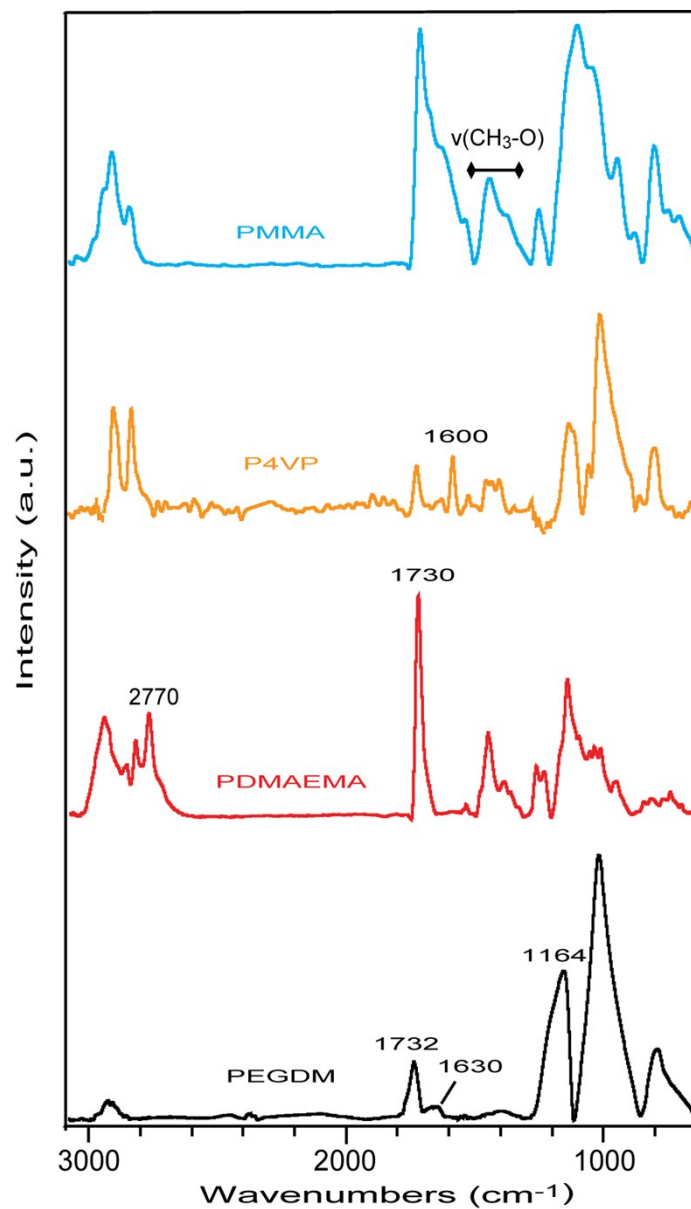

**Figure S1.** FTIR spectra of PEGDM network, PDMAEMA, P4VP and PMMA brushes on PEGDM.

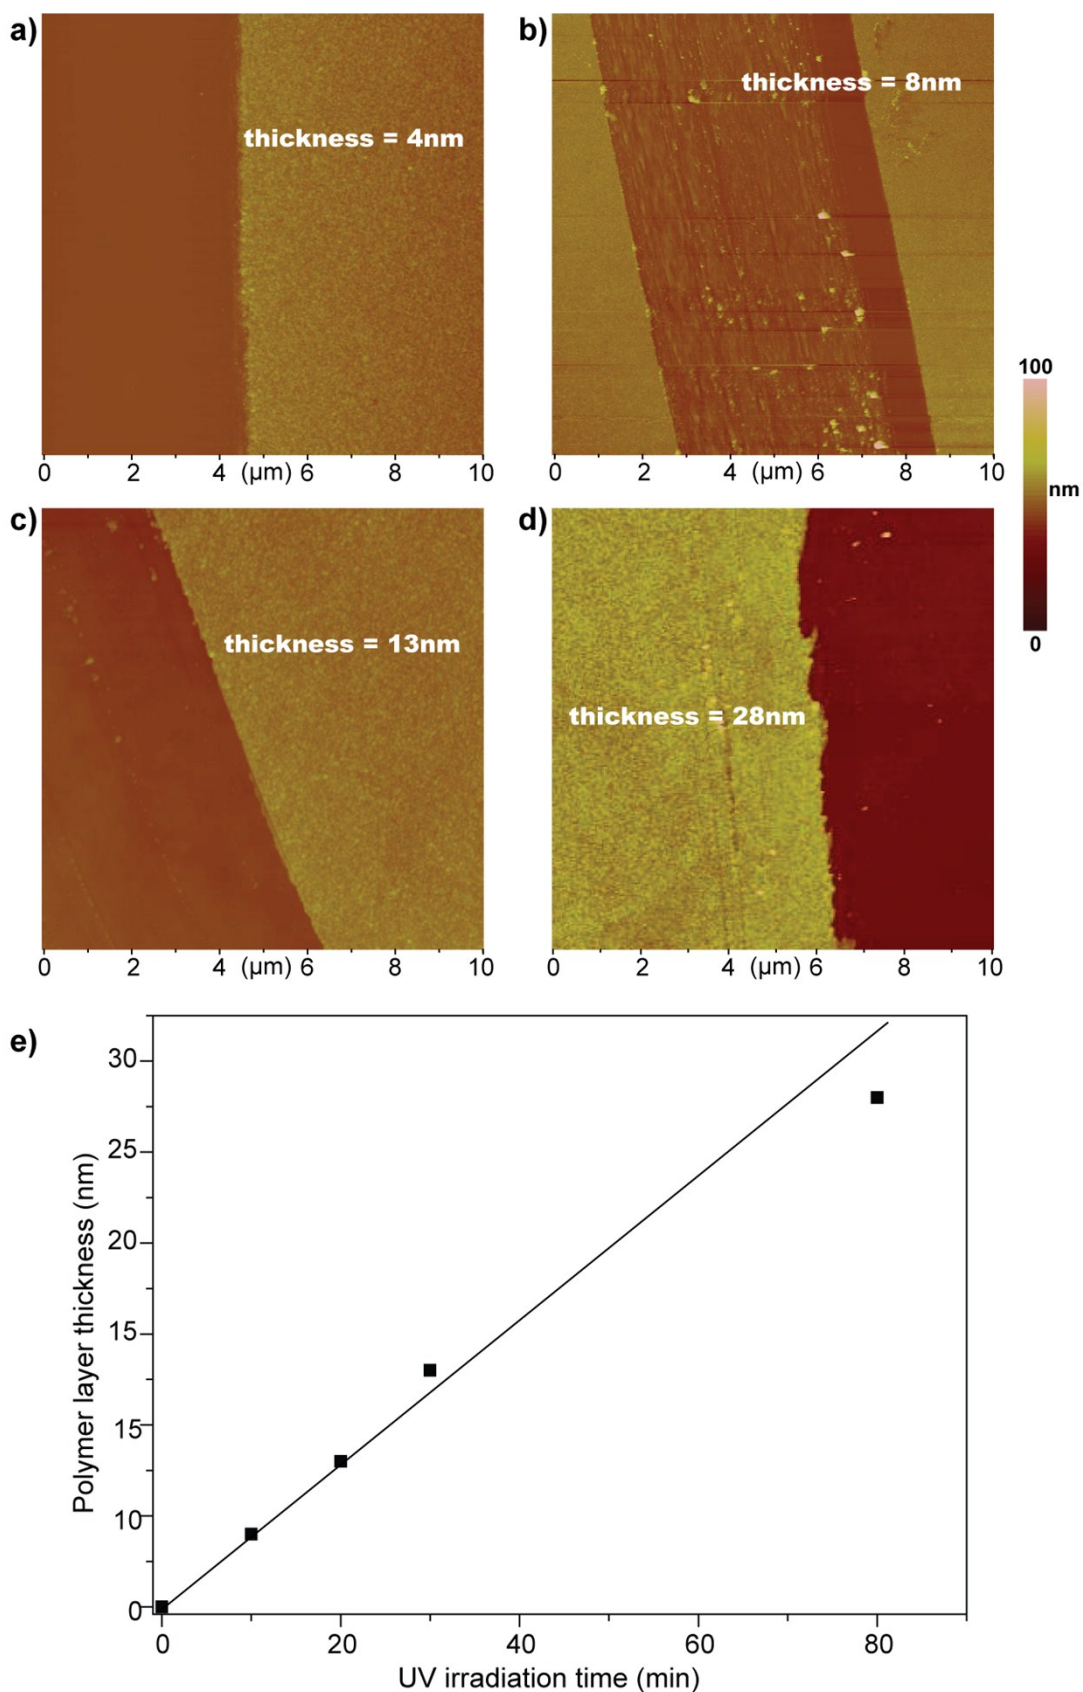

**Figure S2.** AFM scans of PEGDM thin film formed on SAM of TMSPA after different UV polymerization time of EGDM, i.e. 10min (a) , 20min (b), 30min (c) and 80min (d), and the plot of polymer layer thickness versus UV irradiation time (e).

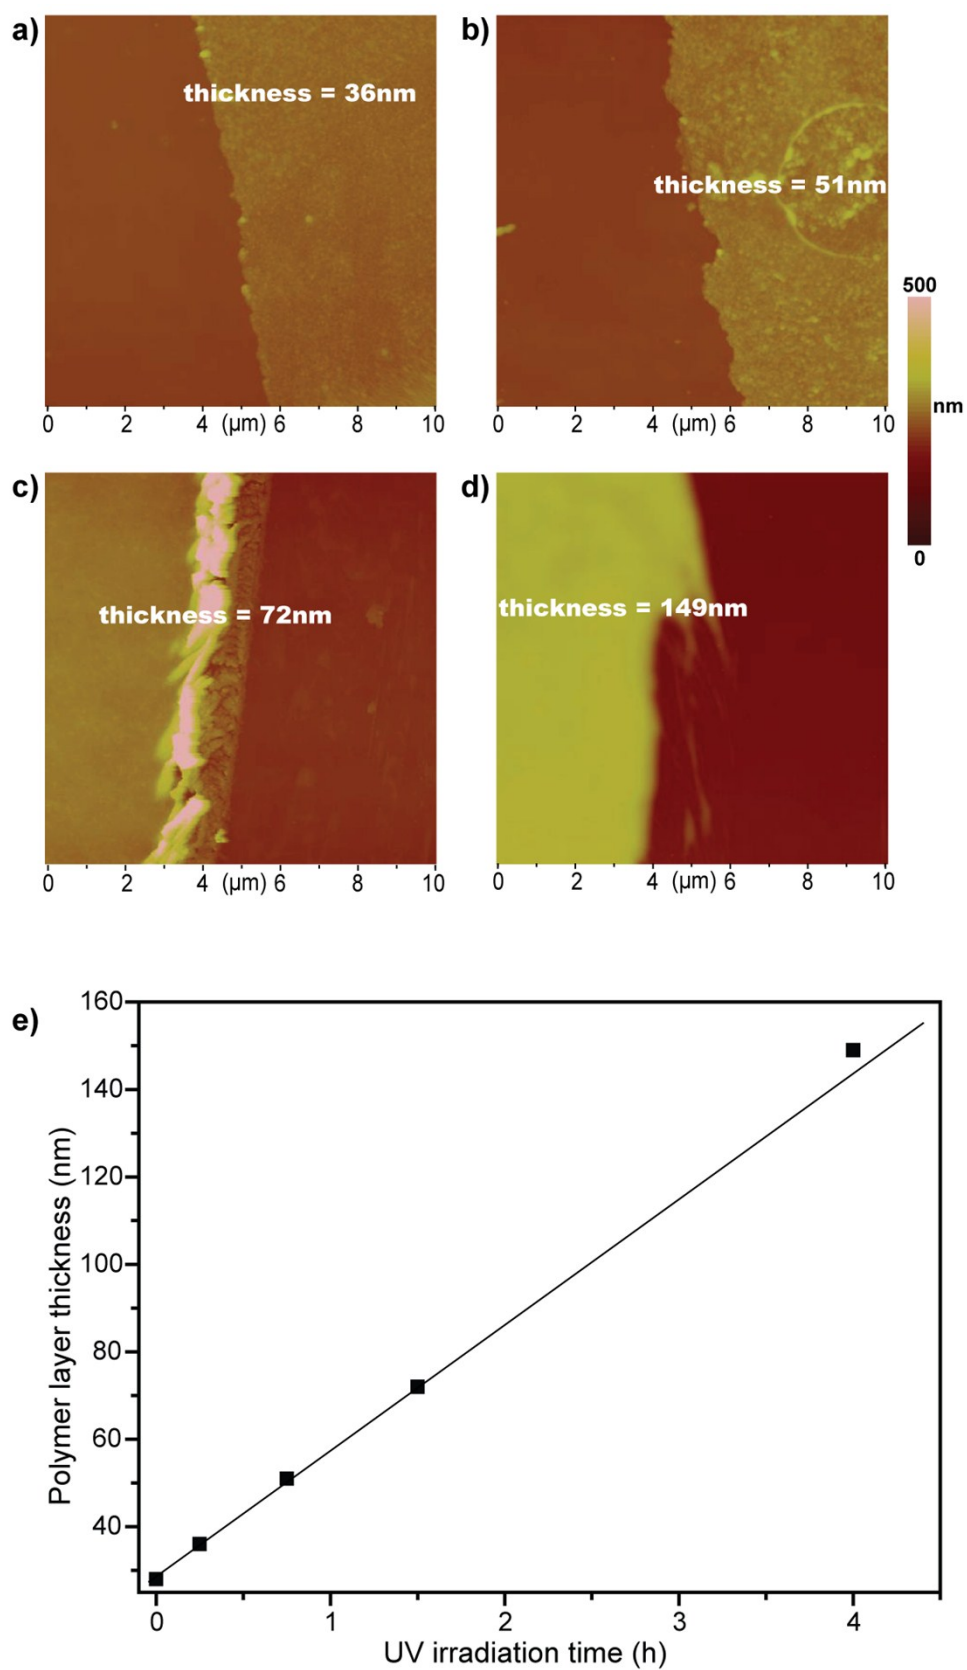

**Figure S3.** AFM scans of PDMAEMA brushes on a 28nm thick PEGDM film after UV polymerization of DMAEMA for different polymerization time: 15min (a), 45min (b), 90min (c) and 4h (d), and the plot of polymer layer thickness versus UV irradiation time (e).

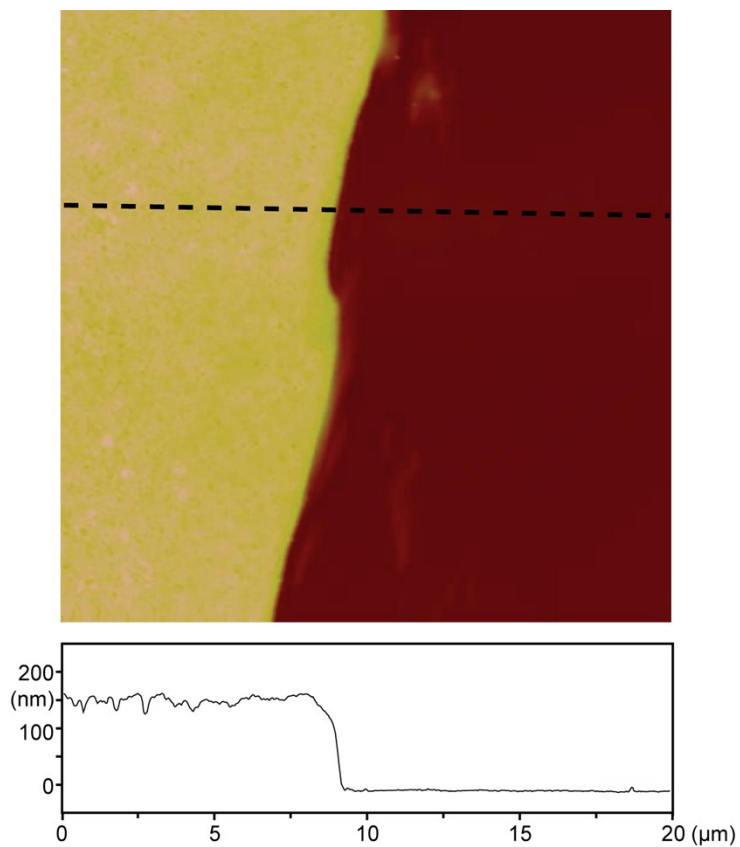

**Figure S4.** AFM scan of P4VP brushes on a 28nm thick PEGDM film.

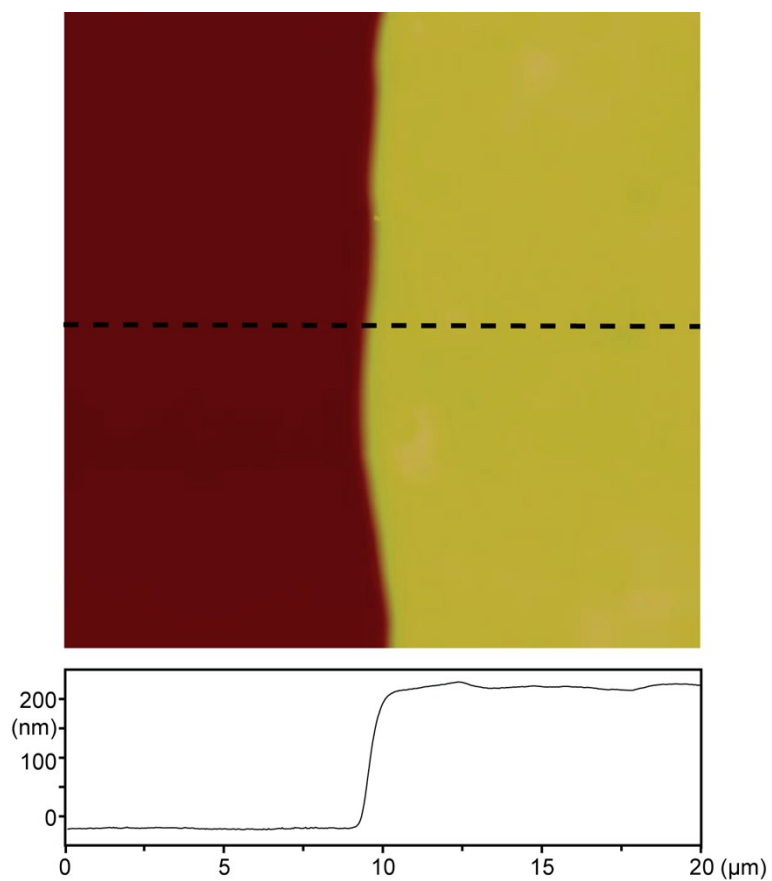

**Figure S5.** AFM scan of PMMA brushes on a 28nm thick PEGDM film.
